# Supplementary material
Source: PubMed Central journal article supplement (PMC6217502)
Supplement: YSCM_A_1374020_SM9505.pdf [file YSCM_A_1374020_SM9505.pdf]

**SUPPLEMENTAL TABLE 1**

Univariable models of factors associated with any wheeze or persistent wheeze

|                                           | Any Wheeze |              |         | Persistent Wheeze |              |         |
|-------------------------------------------|------------|--------------|---------|-------------------|--------------|---------|
|                                           | Odds Ratio | 95% C.I.     | p-value | Odds Ratio        | 95% C.I.     | p-value |
| <b>Age (years)</b>                        | 1.02       | 1.00 - 1.03  | 0.06    | 1.02              | 1.02 - 1.00  | 0.03    |
| <b>Sex</b>                                |            |              |         |                   |              |         |
| Female (ref: Male)                        | 1.07       | 0.61 - 1.86  | 0.82    | 0.93              | 0.45 - 1.90  | 0.84    |
| <b>Race</b>                               |            |              |         |                   |              |         |
| Non-White (ref: White)                    | 0.74       | 0.39 - 1.39  | 0.35    | 1.02              | 0.46 - 2.22  | 0.97    |
| <b>Vitamin D Level (ng/mL)</b>            | 1.01       | 0.99 - 1.03  | 0.35    | 1.02              | 1.00 - 1.04  | 0.07    |
| ≥ 30 (normal)                             | ref        |              |         | ref               |              |         |
| ≥20 - <30 (insufficient)                  | 0.87       | 0.48 - 1.57  | 0.65    | 0.85              | 0.41 - 1.75  | 0.65    |
| <20 (deficient)                           | 1.02       | 0.60 - 1.75  | 0.95    | 0.73              | 0.38 - 1.39  | 0.34    |
| <b>Regional Fat*</b>                      |            |              |         |                   |              |         |
| Android, % fat                            | 1.02       | 1.00 - 1.03  | 0.10    | 1.01              | 0.98 - 1.03  | 0.41    |
| quartile 1 (lowest)                       | ref        |              |         | ref               |              |         |
| quartile 2                                | 1.31       | 0.71 - 2.42  | 0.39    | 0.91              | 0.41 - 2.02  | 0.81    |
| quartile 3                                | 1.09       | 0.59 - 2.03  | 0.78    | 0.95              | 0.43 - 2.11  | 0.89    |
| quartile 4 (highest)                      | 2.05       | 1.11 - 3.78  | 0.02    | 1.53              | 0.73 - 3.22  | 0.26    |
| Gynoid, % fat                             | 1.010      | 0.99 - 1.04  | 0.26    | 1.00              | 0.98 - 1.03  | 0.89    |
| quartile 1 (lowest)                       | ref        |              |         | ref               |              |         |
| quartile 2                                | 1.66       | 0.89 - 3.10  | 0.11    | 1.30              | 0.57 - 2.98  | 0.53    |
| quartile 3                                | 1.59       | 0.87 - 2.92  | 0.13    | 2.23              | 1.05 - 4.75  | 0.04    |
| quartile 4 (highest)                      | 1.43       | 0.78 - 2.61  | 0.25    | 0.99              | 0.43 - 2.27  | 0.98    |
| Trunk, % fat                              | 1.02       | 1.00 - 1.04  | 0.08    | 1.012             | 0.99 - 1.04  | 0.35    |
| quartile 1 (lowest)                       | ref        |              |         | ref               |              |         |
| quartile 2                                | 1.65       | 0.89 - 3.03  | 0.11    | 1.11              | 0.49 - 2.51  | 0.81    |
| quartile 3                                | 1.80       | 0.97 - 3.33  | 0.06    | 1.95              | 0.92 - 4.22  | 0.09    |
| quartile 4 (highest)                      | 1.89       | 1.02 - 3.51  | 0.04    | 1.42              | 0.64 - 3.17  | 0.39    |
| Total body, % fat                         | 1.02       | 1.00 - 1.05  | 0.06    | 1.02              | 0.98 - 1.05  | 0.36    |
| quartile 1 (lowest)                       | ref        |              |         | ref               |              |         |
| quartile 2                                | 2.17       | 1.16 - 4.06  | 0.02    | 1.52              | 0.66 - 3.54  | 0.33    |
| quartile 3                                | 2.07       | 1.11 - 3.86  | 0.02    | 2.56              | 1.16 - 5.66  | 0.02    |
| quartile 4 (highest)                      | 2.12       | 1.14 - 3.95  | 0.02    | 1.50              | 0.65 - 3.49  | 0.34    |
| <b>BMI (kg/m<sup>2</sup>)</b>             | 1.05       | 1.01 - 1.09  | 0.01    | 1.07              | 1.02 - 1.11  | 0.00    |
| < 25 (normal or underweight)              | ref        |              |         | ref               |              |         |
| 25-<30 (overweight)                       | 1.12       | 0.67 - 1.88  | 0.66    | 1.05              | 0.52 - 2.11  | 0.90    |
| ≥30 (obese)                               | 2.14       | 1.26 - 3.65  | 0.01    | 2.13              | 1.11 - 4.10  | 0.02    |
| <b>Cigarette Smoking</b>                  |            |              |         |                   |              |         |
| Current ≥1/2 pack/day                     | 4.82       | 2.05 - 11.34 | <0.01   | 4.86              | 2.00 - 11.83 | <0.01   |
| Current <1/2 pack/day                     | 1.81       | 0.81 - 4.02  | <0.01   | 2.65              | 1.02 - 6.89  | 0.05    |
| Former                                    | 2.12       | 1.31 - 3.44  | <.001   | 1.79              | 0.93 - 3.45  | 0.08    |
| Never                                     | ref        |              |         | ref               |              |         |
| <b>Marijuana</b>                          |            |              |         |                   |              |         |
| Current                                   | 1.01       | 0.52 - 1.95  | 0.98    | 0.88              | 0.37 - 2.11  | 0.78    |
| Former                                    | 1.90       | 0.97 - 3.70  | 0.06    | 1.43              | 0.65 - 3.10  | 0.37    |
| Never                                     | ref        |              |         | ref               |              |         |
| <b>Occupational dust or fume exposure</b> | 1.09       | 0.71 - 1.68  | 0.69    | 1.09              | 0.63 - 1.89  | 0.76    |
| <b>Medical conditions</b>                 |            |              |         |                   |              |         |
| Hay fever                                 | 1.87       | 1.11 - 3.14  | 0.02    | 1.24              | 0.66 - 2.34  | 0.51    |
| Diabetes                                  | 1.88       | 1.03 - 3.46  | 0.04    | 2.08              | 1.06 - 4.10  | 0.03    |
| Heart disease                             | 1.92       | 0.98 - 3.79  | 0.06    | 3.18              | 1.56 - 6.48  | 0.00    |
| <b>Pulmonary medication</b>               |            |              |         |                   |              |         |
| Current use (ref: no medication)          | 6.11       | 2.60 - 14.39 | <0.01   | 5.53              | 2.68 - 11.40 | <0.01   |
| <b>Injury Duration (years)</b>            | 1.01       | 0.99 - 1.02  | 0.50    | 1.01              | 0.99 - 1.03  | 0.56    |
| <b>SCI Classification</b>                 |            |              |         |                   |              |         |
| Motor complete cervical & AIS C           | 1.17       | 0.68 - 2.01  | 0.57    | 0.48              | 0.22 - 1.02  | 0.06    |
| Motor complete high thoracic & AIS C      | 0.65       | 0.33 - 1.29  | 0.22    | 0.83              | 0.37 - 1.90  | 0.66    |
| Motor complete low thoracic & AIS C       | 0.63       | 0.35 - 1.14  | 0.13    | 0.80              | 0.39 - 1.63  | 0.53    |
| All AIS D                                 | ref        |              |         | ref               |              |         |

\* Android, % fat quartiles: 0- ≤ 36, >36- ≤ 45, >45- ≤ 52, >52%  
 Gynoid, % fat quartiles: 0- ≤ 34, >34- ≤ 40, >40- ≤ 47, >47%  
 Trunk, % fat quartiles: 0- ≤ 34, >34- ≤ 42, >42- ≤ 48, >48%  
 Total body, % fat quartiles: 0- ≤ 31, >31- ≤ 38, >38- ≤ 43, >43%

**SUPPLEMENTAL TABLE 2**

Univariable models of factors associated with chronic cough or chronic phlegm

|                                           | Chronic Cough |              |         | Chronic Phlegm |              |         |
|-------------------------------------------|---------------|--------------|---------|----------------|--------------|---------|
|                                           | Odds Ratio    | 95% C.I.     | p-value | Odds Ratio     | 95% C.I.     | p-value |
| <b>Age (years)</b>                        | 1.02          | 1.00 - 1.05  | 0.11    | 1.01           | 0.99 - 1.03  | 0.33    |
| <b>Sex</b>                                |               |              |         |                |              |         |
| Female (ref: Male)                        | 1.13          | 0.47 - 2.72  | 0.78    | 0.34           | 0.12 - 0.99  | 0.05    |
| <b>Race</b>                               |               |              |         |                |              |         |
| Non-White (ref: White)                    | 0.54          | 0.16 - 1.85  | 0.33    | 0.48           | 0.17 - 1.40  | 0.18    |
| <b>Vitamin D Level (ng/mL)</b>            | 0.98          | 0.95 - 1.02  | 0.36    | 1.00           | 0.98 - 1.03  | 0.81    |
| ≥ 30 (normal)                             | ref           |              |         | ref            |              |         |
| ≥20 - <30 (insufficient)                  | 1.05          | 0.43 - 2.57  | 0.91    | 0.85           | 0.42 - 1.72  | 0.65    |
| <20 (deficient)                           | 1.45          | 0.56 - 3.73  | 0.45    | 0.70           | 0.31 - 1.60  | 0.40    |
| <b>Regional Fat*</b>                      |               |              |         |                |              |         |
| Android, % fat                            | 1.00          | 0.97 - 1.03  | 0.93    | 0.99           | 0.97 - 1.01  | 0.45    |
| quartile 1 (lowest)                       | ref           |              |         | ref            |              |         |
| quartile 2                                | 1.27          | 0.47 - 3.38  | 0.64    | 0.81           | 0.34 - 1.93  | 0.64    |
| quartile 3                                | 0.89          | 0.31 - 2.57  | 0.82    | 1.12           | 0.49 - 2.56  | 0.78    |
| quartile 4 (highest)                      | 1.28          | 0.48 - 3.43  | 0.62    | 0.82           | 0.35 - 1.96  | 0.66    |
| Gynoid, % fat                             | 0.99          | 0.96 - 1.03  | 0.64    | 0.98           | 0.95 - 1.01  | 0.19    |
| quartile 1 (lowest)                       | ref           |              |         | ref            |              |         |
| quartile 2                                | 0.92          | 0.34 - 2.46  | 0.86    | 0.98           | 0.41 - 2.33  | 0.96    |
| quartile 3                                | 1.14          | 0.46 - 2.85  | 0.77    | 1.53           | 0.70 - 3.35  | 0.29    |
| quartile 4 (highest)                      | 0.56          | 0.19 - 1.61  | 0.28    | 0.56           | 0.22 - 1.43  | 0.23    |
| Trunk, % fat                              | 1.00          | 0.97 - 1.03  | 0.89    | 0.98           | 0.96 - 1.01  | 0.25    |
| quartile 1 (lowest)                       | ref           |              |         | ref            |              |         |
| quartile 2                                | 1.30          | 0.49 - 3.46  | 0.60    | 0.84           | 0.35 - 1.98  | 0.68    |
| quartile 3                                | 1.37          | 0.51 - 3.66  | 0.53    | 1.38           | 0.62 - 3.07  | 0.43    |
| quartile 4 (highest)                      | 0.95          | 0.33 - 2.74  | 0.92    | 0.72           | 0.29 - 1.79  | 0.48    |
| Total body, % fat                         | 1.00          | 0.96 - 1.04  | 0.86    | 0.98           | 0.96 - 1.02  | 0.45    |
| quartile 1 (lowest)                       | ref           |              |         | ref            |              |         |
| quartile 2                                | 1.57          | 0.57 - 4.33  | 0.39    | 1.06           | 0.45 - 2.51  | 0.90    |
| quartile 3                                | 1.88          | 0.70 - 5.03  | 0.21    | 1.45           | 0.64 - 3.28  | 0.37    |
| quartile 4 (highest)                      | 0.87          | 0.28 - 2.70  | 0.81    | 0.83           | 0.34 - 2.05  | 0.69    |
| <b>BMI (kg/m<sup>2</sup>)</b>             | 1.00          | 0.94 - 1.06  | 0.97    | 0.99           | 0.95 - 1.04  | 0.82    |
| < 25 (normal or underweight)              | ref           |              |         | ref            |              |         |
| 25-<30 (overweight)                       | 1.33          | 0.57 - 3.11  | 0.51    | 0.85           | 0.41 - 1.75  | 0.65    |
| ≥30 (obese)                               | 1.39          | 0.59 - 3.31  | 0.45    | 1.21           | 0.60 - 2.44  | 0.60    |
| <b>Cigarette Smoking</b>                  |               |              |         |                |              |         |
| Current ≥1/2 pack/day                     | 5.06          | 1.67 - 15.31 | 0.00    | 6.84           | 2.61 - 17.95 | <0.01   |
| Current <1/2 pack/day                     | 4.16          | 1.32 - 13.05 | 0.02    | 4.30           | 1.56 - 11.88 | 0.01    |
| Former                                    | 1.96          | 0.81 - 4.79  | 0.14    | 2.17           | 1.01 - 4.66  | 0.05    |
| Never                                     | ref           |              |         | ref            |              |         |
| <b>Marijuana</b>                          |               |              |         |                |              |         |
| Current                                   | 1.22          | 0.44 - 3.37  | 0.71    | 1.70           | 0.75 - 3.84  | 0.20    |
| Former                                    | 1.25          | 0.45 - 3.47  | 0.67    | 1.28           | 0.53 - 3.11  | 0.58    |
| Never                                     | ref           |              |         | ref            |              |         |
| <b>Occupational dust or fume exposure</b> | 1.30          | 0.64 - 2.66  | 0.47    | 1.94           | 1.02 - 3.69  | 0.04    |
| <b>Medical conditions</b>                 |               |              |         |                |              |         |
| Hay fever                                 | 1.70          | 0.80 - 3.65  | 0.17    | 0.97           | 0.47 - 2.00  | 0.94    |
| Diabetes                                  | 2.16          | 0.95 - 4.93  | 0.07    | 1.73           | 0.82 - 3.66  | 0.15    |
| Heart disease                             | 1.30          | 0.47 - 3.56  | 0.62    | 1.02           | 0.41 - 2.57  | 0.97    |
| <b>Pulmonary medication</b>               |               |              |         |                |              |         |
| Current use (ref: no medication)          | 4.16          | 1.81 - 9.56  | <0.01   | 3.88           | 1.82 - 8.29  | <0.01   |
| <b>Injury Duration (years)</b>            | 1.02          | 1.00 - 1.05  | 0.06    | 1.00           | 0.98 - 1.02  | 0.80    |
| <b>SCI Classification</b>                 |               |              |         |                |              |         |
| Motor complete cervical & AIS C           | 0.56          | 0.21 - 1.48  | 0.24    | 0.91           | 0.44 - 1.90  | 0.81    |
| Motor complete high thoracic & AIS C      | 1.07          | 0.40 - 2.87  | 0.90    | 0.59           | 0.21 - 1.64  | 0.31    |
| Motor complete low thoracic & AIS C       | 0.68          | 0.26 - 1.79  | 0.43    | 0.73           | 0.32 - 1.65  | 0.45    |
| All AIS D                                 | ref           |              |         | ref            |              |         |

\* Android, % fat quartiles: 0- ≤ 36, >36- ≤ 45, >45- ≤ 52, >52%  
 Gynoid, % fat quartiles: 0- ≤ 34, >34- ≤ 40, >40- ≤ 47, >47%  
 Trunk, % fat quartiles: 0- ≤ 34, >34- ≤ 42, >42- ≤ 48, >48%  
 Total body, % fat quartiles: 0- ≤ 31, >31- ≤ 38, >38- ≤ 43, >43%

**SUPPLEMENTAL TABLE 3**

Multivariable models of factors associated with wheeze stratified by SCI severity and level

| <b>Any Wheeze - Motor Complete and AIS C (n=197)</b> |            |             |         |
|------------------------------------------------------|------------|-------------|---------|
| Characteristic                                       | Odds Ratio | 95% C.I.    | p-value |
| <b>Hay fever (ref: never)</b>                        | 1.63       | 0.80, 3.34  | 0.18    |
| <b>Cigarette Smoking</b>                             |            |             |         |
| current $\geq 1/2$ pack/day                          | 10.43      | 2.62, 41.61 | <0.01   |
| current <1/2 pack/day                                | 2.17       | 0.63, 7.42  | 0.22    |
| former                                               | 1.66       | 0.86, 3.22  | 0.13    |
| never                                                | ref        |             |         |
| <b>BMI (kg/m<sup>2</sup>)</b>                        |            |             |         |
| $\geq 30$ (obese)                                    | 2.27       | 1.01, 5.10  | 0.05    |
| 25-<30 (overweight)                                  | 1.40       | 0.68, 2.90  | 0.36    |
| < 25 (normal or underweight)                         | ref        |             |         |
| <b>Vitamin D Level (ng/mL)</b>                       |            |             |         |
| <20 (deficient)                                      | 0.62       | 0.27, 1.45  | 0.27    |
| $\geq 20$ - <30 (insufficient)                       | 0.82       | 0.40, 1.70  | 0.59    |
| $\geq 30$ (normal)                                   | ref        |             |         |

| <b>Any Wheeze - AIS D (n=146)</b> |            |             |         |
|-----------------------------------|------------|-------------|---------|
| Characteristic                    | Odds Ratio | 95% C.I.    | p-value |
| <b>Hay fever (ref: never)</b>     | 2.25       | 0.92, 5.52  | 0.08    |
| <b>Cigarette Smoking</b>          |            |             |         |
| current $\geq 1/2$ pack/day       | 4.05       | 1.09, 15.06 | 0.04    |
| current <1/2 pack/day             | 2.19       | 0.66, 7.29  | 0.20    |
| former                            | 2.42       | 1.03, 5.67  | 0.04    |
| never                             | ref        |             |         |
| <b>BMI (kg/m<sup>2</sup>)</b>     |            |             |         |
| $\geq 30$ (obese)                 | 2.87       | 1.21, 6.82  | 0.02    |
| 25-<30 (overweight)               | 0.96       | 0.39, 2.34  | 0.92    |
| < 25 (normal or underweight)      | ref        |             |         |
| <b>Vitamin D Level (ng/mL)</b>    |            |             |         |
| <20 (deficient)                   | 1.08       | 0.39, 2.99  | 0.88    |
| $\geq 20$ - <30 (insufficient)    | 1.35       | 0.55, 3.29  | 0.51    |
| $\geq 30$ (normal)                | ref        |             |         |

| <b>Persistent Wheeze - Motor Complete and AIS C (n=197)</b> |            |             |         |
|-------------------------------------------------------------|------------|-------------|---------|
| Characteristic                                              | Odds Ratio | 95% C.I.    | p-value |
| <b>Heart disease last 10 yrs (ref: never)</b>               | 7.08       | 1.97, 25.44 | <0.01   |
| <b>Cigarette Smoking</b>                                    |            |             |         |
| current $\geq 1/2$ pack/day                                 | 11.65      | 2.99, 45.38 | <0.01   |
| current <1/2 pack/day                                       | 5.76       | 1.39, 23.94 | 0.02    |
| former                                                      | 1.12       | 0.40, 3.14  | 0.83    |
| never                                                       | ref        |             |         |
| <b>BMI (kg/m<sup>2</sup>)</b>                               |            |             |         |
| $\geq 30$ (obese)                                           | 3.37       | 1.06, 10.69 | 0.04    |
| 25-<30 (overweight)                                         | 1.54       | 0.54, 4.41, | 0.42    |
| < 25 (normal or underweight)                                | ref        |             |         |
| <b>Vitamin D Level (ng/mL)</b>                              |            |             |         |
| <20 (deficient)                                             | 0.71       | 0.24, 2.11  | 0.53    |
| $\geq 20$ - <30 (insufficient)                              | 0.53       | 0.19, 1.49  | 0.23    |
| $\geq 30$ (normal)                                          | ref        |             |         |

| <b>Persistent Wheeze - AIS D (n=146)</b>      |            |             |         |
|-----------------------------------------------|------------|-------------|---------|
| Characteristic                                | Odds Ratio | 95% C.I.    | p-value |
| <b>Heart disease last 10 yrs (ref: never)</b> | 1.70       | 0.60, 4.84  | 0.32    |
| <b>Cigarette Smoking</b>                      |            |             |         |
| current $\geq 1/2$ pack/day                   | 3.09       | 0.75, 12.80 | 0.12    |
| current <1/2 pack/day                         | 1.72       | 0.41, 7.22  | 0.46    |
| former                                        | 1.41       | 0.51, 3.88  | 0.50    |
| never                                         | ref        |             |         |
| <b>BMI (kg/m<sup>2</sup>)</b>                 |            |             |         |
| $\geq 30$ (obese)                             | 2.48       | 0.92, 6.64  | 0.07    |
| 25-<30 (overweight)                           | 0.72       | 0.22, 2.31  | 0.58    |
| < 25 (normal or underweight)                  | ref        |             |         |
| <b>Vitamin D Level (ng/mL)</b>                |            |             |         |
| <20 (deficient)                               | 0.87       | 0.26, 2.89  | 0.83    |
| $\geq 20$ - <30 (insufficient)                | 1.11       | 0.39, 3.15  | 0.84    |
| $\geq 30$ (normal)                            | ref        |             |         |

**SUPPLEMENTAL TABLE 4**

Multivariable models of factors associated with respiratory symptoms including vitamin D and pulmonary medication use

| <b>Cough</b>                     |            |             |         | <b>Phlegm</b>                                 |            |              |         |
|----------------------------------|------------|-------------|---------|-----------------------------------------------|------------|--------------|---------|
| Characteristic                   | Odds Ratio | 95% C.I.    | p-value | Characteristic                                | Odds Ratio | 95% C.I.     | p-value |
| <b>Injury duration</b>           | 1.02       | 1.00, 1.05  | 0.08    | <b>Female (ref: Male)</b>                     | 0.24       | 0.07, 0.77   | 0.02    |
| <b>Cigarette Smoking</b>         |            |             |         | <b>Cigarette Smoking</b>                      |            |              |         |
| current $\geq 1/2$ pack/day      | 5.47       | 1.75, 17.14 | <0.01   | current $\geq 1/2$ pack/day                   | 8.12       | 2.99, 22.02  | <0.01   |
| current <1/2 pack/day            | 3.47       | 1.06, 11.35 | 0.04    | current <1/2 pack/day                         | 3.76       | 1.30, 10.84  | 0.01    |
| former                           | 1.80       | 0.72, 4.49  | 0.21    | former                                        | 1.89       | 0.85, 4.17   | 0.12    |
| never                            | ref        |             |         | never                                         | ref        |              |         |
| <b>Pulmonary medication</b>      |            |             |         | <b>Pulmonary medication</b>                   |            |              |         |
| Current use (ref: no medication) | 4.12       | 1.70, 9.97  | <0.01   | Current use (ref: no medication)              | 4.54       | 2.01, 10.28  | <0.01   |
| <b>Vitamin D Level (ng/mL)</b>   |            |             |         | <b>Vitamin D Level (ng/mL)</b>                |            |              |         |
| <20 (deficient)                  | 1.52       | 0.55, 4.15  | 0.42    | <20 (deficient)                               | 0.57       | 0.23, 1.39   | 0.22    |
| $\geq 20$ - <30 (insufficient)   | 1.06       | 0.41, 2.72  | 0.90    | $\geq 20$ - <30 (insufficient)                | 0.84       | 0.39, 1.78   | 0.64    |
| $\geq 30$ (normal)               | ref        |             |         | $\geq 30$ (normal)                            | ref        |              |         |
| <b>Any Wheeze</b>                |            |             |         | <b>Persistent Wheeze</b>                      |            |              |         |
| Characteristic                   | Odds Ratio | 95% C.I.    | p-value | Characteristic                                | Odds Ratio | 95% C.I.     | p-value |
| <b>Hay fever (ref: never)</b>    | 1.70       | 0.96, 3.01  | 0.07    | <b>Heart disease last 10 yrs (ref: never)</b> | 3.07       | 1.37, 6.86   | <0.01   |
| <b>Cigarette Smoking</b>         |            |             |         | <b>Cigarette Smoking</b>                      |            |              |         |
| current $\geq 1/2$ pack/day      | 6.08       | 2.47, 14.93 | <0.01   | current $\geq 1/2$ pack/day                   | 6.27       | 2.40, 16.384 | <0.01   |
| current <1/2 pack/day            | 1.79       | 0.77, 4.19  | 0.18    | current <1/2 pack/day                         | 2.51       | 0.90, 6.99   | 0.08    |
| former                           | 1.87       | 1.12, 3.14  | 0.02    | former                                        | 1.35       | 0.66, 2.75   | 0.41    |
| never                            | ref        |             |         | never                                         | ref        |              |         |
| <b>Pulmonary medication</b>      |            |             |         | <b>Pulmonary medication</b>                   |            |              |         |
| Current use (ref: no medication) | 5.21       | 2.16, 12.59 | <0.01   | Current use (ref: no medication)              | 5.34       | 2.48, 11.50  | <0.01   |
| <b>BMI (kg/m<sup>2</sup>)</b>    |            |             |         | <b>BMI (kg/m<sup>2</sup>)</b>                 |            |              |         |
| >30 (obese)                      | 2.27       | 1.26, 4.11  | 0.01    | >30 (obese)                                   | 2.35       | 1.12, 4.94   | 0.02    |
| 25-30 (overweight)               | 1.14       | 0.65, 2.01  | 0.65    | 25-30 (overweight)                            | 1.12       | 0.52, 2.43   | 0.78    |
| < 25 (normal or underweight)     | ref        |             |         | < 25 (normal or underweight)                  | ref        |              |         |
| <b>Vitamin D Level (ng/mL)</b>   |            |             |         | <b>Vitamin D Level (ng/mL)</b>                |            |              |         |
| <20 (deficient)                  | 0.80       | 0.41, 1.55  | 0.50    | <20 (deficient)                               | 0.89       | 0.39, 2.03   | 0.79    |
| $\geq 20$ - <30 (insufficient)   | 1.00       | 0.56, 1.78  | 1.00    | $\geq 20$ - <30 (insufficient)                | 0.78       | 0.37, 1.65   | 0.52    |
| $\geq 30$ (normal)               | ref        |             |         | $\geq 30$ (normal)                            | ref        |              |         |

**SUPPLEMENTAL TABLE 5.**

Multivariable models of factors associated with any wheeze and persistent wheeze including effects of adiposity and pulmonary medication

| Characteristic                               | ANY WHEEZE        |             |         |            |             |         |            |             |         |            |             |         |
|----------------------------------------------|-------------------|-------------|---------|------------|-------------|---------|------------|-------------|---------|------------|-------------|---------|
|                                              | Android           |             |         | Gynoid     |             |         | Trunk      |             |         | Total Body |             |         |
|                                              | Odds Ratio        | 95% C.I.    | p-value | Odds Ratio | 95% C.I.    | p-value | Odds Ratio | 95% C.I.    | p-value | Odds Ratio | 95% C.I.    | p-value |
| <b>Hay fever (ref: never)</b>                | 1.87              | 1.19, 3.61  | 0.03    | 1.78       | 1.00, 3.16  | 0.05    | 1.82       | 1.03, 3.22  | 0.04    | 1.74       | 0.99, 3.09  | 0.06    |
| <b>Cigarette Smoking</b>                     |                   |             |         |            |             |         |            |             |         |            |             |         |
| current $\geq$ 1/2 pack/day                  | 8.11              | 3.14, 20.94 | <0.01   | 7.74       | 2.98, 20.07 | <0.01   | 8.17       | 3.13, 21.28 | <0.01   | 7.86       | 3.02, 20.46 | <0.01   |
| current <1/2 pack/day                        | 1.98              | 0.83, 4.71  | 0.12    | 2.05       | 0.87, 4.85  | 0.10    | 1.96       | 0.83, 4.66  | 0.13    | 2.00       | 0.84, 4.76  | 0.12    |
| former                                       | 2.21              | 1.30, 3.76  | <0.01   | 2.11       | 1.27, 3.51  | <0.01   | 1.95       | 1.17, 3.26  | 0.01    | 1.93       | 1.16, 3.22  | 0.01    |
| never                                        | ref               |             |         | ref        |             |         | ref        |             |         | ref        |             |         |
| <b>Pulmonary medication</b>                  |                   |             |         |            |             |         |            |             |         |            |             |         |
| Current use (ref: no medication)             | 5.22              | 2.13, 12.79 | <0.01   | 5.19       | 2.12, 12.69 | <0.01   | 5.32       | 2.16, 13.07 | <0.01   | 5.31       | 2.16, 13.05 | <0.01   |
| <b>Region %fat</b>                           |                   |             |         |            |             |         |            |             |         |            |             |         |
| quartile 1 (lowest)                          | ref               |             |         | ref        |             |         | ref        |             |         | ref        |             |         |
| quartile 2                                   | 1.38              | 0.70, 2.72  | 0.35    | 1.95       | 0.98, 3.87  | 0.06    | 1.94       | 0.99, 3.82  | 0.06    | 2.38       | 1.20, 4.72  | 0.01    |
| quartile 3                                   | 1.31              | 0.65, 2.65  | 0.46    | 2.21       | 1.13, 4.32  | 0.02    | 2.19       | 1.09, 4.39  | 0.03    | 2.41       | 1.21, 4.81  | 0.01    |
| quartile 4 (highest)                         | 2.99              | 1.50, 5.96  | <0.01   | 1.80       | 0.93, 3.51  | 0.08    | 2.67       | 1.33, 5.35  | <0.01   | 2.79       | 1.40, 5.60  | <0.01   |
| Characteristic                               | PERSISTENT WHEEZE |             |         |            |             |         |            |             |         |            |             |         |
|                                              | Android           |             |         | Gynoid     |             |         | Trunk      |             |         | Total Body |             |         |
|                                              | Odds Ratio        | 95% C.I.    | p-value | Odds Ratio | 95% C.I.    | p-value | Odds Ratio | 95% C.I.    | p-value | Odds Ratio | 95% C.I.    | p-value |
| <b>Heart disease last 10yrs (ref: never)</b> | 3.45              | 1.55, 7.68  | <0.01   | 3.40       | 1.52, 7.60  | <0.01   | 3.32       | 1.50, 7.34  | <0.01   | 3.17       | 1.44, 7.01  | <0.01   |
| <b>Cigarette Smoking</b>                     |                   |             |         |            |             |         |            |             |         |            |             |         |
| current $\geq$ 1/2 pack/day                  | 7.42              | 2.73, 20.17 | <.01    | 6.99       | 2.62, 18.65 | <.01    | 7.14       | 2.64, 19.30 | <0.01   | 6.99       | 2.58, 18.95 | <0.01   |
| current <1/2 pack/day                        | 2.65              | 0.94, 7.49  | 0.07    | 2.51       | 0.88, 7.16  | 0.08    | 2.74       | 0.97, 7.75  | 0.06    | 2.59       | 0.91, 7.37  | 0.08    |
| former                                       | 1.35              | 0.65, 2.79  | 0.42    | 1.34       | 0.66, 2.75  | 0.42    | 1.23       | 0.60, 2.51  | 0.57    | 1.24       | 0.61, 2.53  | 0.56    |
| never                                        | ref               |             |         | ref        |             |         | ref        |             |         | ref        |             |         |
| <b>Pulmonary medication</b>                  |                   |             |         |            |             |         |            |             |         |            |             |         |
| Current use (ref: no medication)             | 5.40              | 2.45, 11.90 | <.01    | 5.66       | 2.55, 12.57 | <.01    | 5.39       | 2.46, 11.78 | <0.01   | 5.59       | 2.54, 12.28 | <0.01   |
| <b>Region %fat</b>                           |                   |             |         |            |             |         |            |             |         |            |             |         |
| quartile 1 (lowest)                          | ref               |             |         | ref        |             |         | ref        |             |         | ref        |             |         |
| quartile 2                                   | 0.95              | 0.39, 2.31  | 0.91    | 1.35       | 0.54, 3.36  | 0.53    | 1.23       | 0.50, 3.05  | 0.65    | 1.60       | 0.64, 4.02  | 0.32    |
| quartile 3                                   | 1.43              | 0.57, 3.59  | 0.45    | 3.16       | 1.35, 7.40  | <.01    | 2.68       | 1.12, 6.44  | 0.03    | 3.29       | 1.35, 8.02  | <0.01   |
| quartile 4 (highest)                         | 2.28              | 0.97, 5.39  | 0.06    | 1.32       | 0.52, 3.31  | 0.56    | 1.98       | 0.80, 4.92  | 0.14    | 2.08       | 0.81, 5.36  | 0.13    |
